1 **Title: Safety, pharmacokinetics, and liver-stage *Plasmodium cynomolgi* effect of high-**  
2 **dose ivermectin and chloroquine in Rhesus Macaques**

3

4 **Running Title: Ivermectin and Chloroquine Interaction in Macaques**

5

6 **Authors:**

7 Pattaraporn Vanachayangkul <sup>A</sup>

8 [pattarapornv.fsn@afirms.org](mailto:pattarapornv.fsn@afirms.org)

9 Rawiwan Im-erbsin <sup>B</sup>

10 [RawiwanI.fsn@afirms.org](mailto:RawiwanI.fsn@afirms.org)

11 Anchalee Tungtaeng <sup>B</sup>

12 [AnchaleeT.fsn@afirms.org](mailto:AnchaleeT.fsn@afirms.org)

13 Chanikarn Kodchakorn <sup>A</sup>

14 [ChanikarnK.ca@afirms.org](mailto:ChanikarnK.ca@afirms.org)

15 Alison Roth <sup>C,D</sup>

16 [alison.e.roth.ctr@mail.mil](mailto:alison.e.roth.ctr@mail.mil)

17 John Adams <sup>D</sup>

18 [ja2@usf.edu](mailto:ja2@usf.edu)

19 Chaiyaporn Chaisatit <sup>A</sup>

20 [ChaiyapornC.ca@afirms.org](mailto:ChaiyapornC.ca@afirms.org)

21 Piyaporn Saingam <sup>A</sup>

22 [PiyapornS.fsn@afirms.org](mailto:PiyapornS.fsn@afirms.org)

23 Richard J. Sciotti <sup>C</sup>

24 [rick.sciotti@nih.gov](mailto:rick.sciotti@nih.gov)

- 25 Gregory A. Reichard <sup>C</sup>  
26 [gregory.a.reichard2.civ@mail.mil](mailto:gregory.a.reichard2.civ@mail.mil)
- 27 Christina K. Nolan <sup>C</sup>  
28 [christina.k.nolan.ctr@mail.mil](mailto:christina.k.nolan.ctr@mail.mil)
- 29 Brandon S. Pybus <sup>C</sup>  
30 [brandon.s.pybus.mil@mail.mil](mailto:brandon.s.pybus.mil@mail.mil)
- 31 Chad C. Black <sup>C</sup>  
32 [chad.c.black.mil@mail.mil](mailto:chad.c.black.mil@mail.mil)
- 33 Luis A. Lugo <sup>B</sup>  
34 [Luis.Lugo.mil@afirms.org](mailto:Luis.Lugo.mil@afirms.org)
- 35 Matthew D. Wegner <sup>B</sup>  
36 [matthew.d.wegner2.mil@mail.mil](mailto:matthew.d.wegner2.mil@mail.mil)
- 37 Philip L. Smith <sup>A</sup>  
38 [philip.l.smith.mil@mail.mil](mailto:philip.l.smith.mil@mail.mil)
- 39 Mariusz Wojnarski <sup>A</sup>  
40 [Mariusz.Wojnarski.mil@afirms.org](mailto:Mariusz.Wojnarski.mil@afirms.org)
- 41 Brian A. Vesely <sup>A</sup>  
42 [Brian.Vesely.mil@afirms.org](mailto:Brian.Vesely.mil@afirms.org)
- 43 Kevin C. Kobylinski <sup>E\*</sup>  
44 [kobylinsikevin@yahoo.com](mailto:kobylinsikevin@yahoo.com)

45 \*Corresponding Author

46

47

48

49

50 **Affiliations:**

51 <sup>A</sup> Department of Bacterial and Parasitic Diseases, Armed Forces Research Institute of Medical  
52 Sciences

53 315/6 Rajvithi Road, Bangkok, Thailand 10400

54

55 <sup>B</sup> Department of Veterinary Medicine, Armed Forces Research Institute of Medical Sciences

56 315/6 Rajvithi Road, Bangkok, Thailand 10400

57

58 <sup>C</sup> Experimental Therapeutics Branch, Walter Reed Army Institute of Research

59 503 Robert Grant Ave, Silver Spring, Maryland USA 20910

60

61 <sup>D</sup> Center for Global Health and Infectious Diseases Research, College of Public Health,

62 University of South Florida

63 13201 Bruce B Downs Blvd, Tampa, Florida USA 33612

64

65 <sup>E</sup> Department of Entomology, Armed Forces Research Institute of Medical Sciences

66 315/6 Rajvithi Road, Bangkok Thailand 10400

67 **Abstract** (max 250 words)

68 Previously, ivermectin (1–10 mg/kg) was shown to inhibit liver-stage development of  
69 *Plasmodium berghei* in orally dosed mice. Here, ivermectin showed inhibition of the *in vitro*  
70 development of *Plasmodium cynomolgi* schizonts ( $IC_{50} = 10.42 \mu M$ ) and hypnozoites ( $IC_{50} =$   
71  $29.24 \mu M$ ) in primary macaque hepatocytes when administered in high-dose prophylactically but  
72 not when administered in radical cure mode. The safety, pharmacokinetics, and efficacy of oral  
73 ivermectin (0.3, 0.6, and 1.2 mg/kg) with and without chloroquine (10 mg/kg) administered for  
74 seven consecutive days was evaluated for prophylaxis or radical cure of *Plasmodium cynomolgi*  
75 liver-stages in Rhesus macaques. No inhibition or delay to blood-stage *P. cynomolgi*  
76 parasitemia was observed at any ivermectin dose (0.3, 0.6, and 1.2 mg/kg). Ivermectin (0.6 and  
77 1.2 mg/kg) and chloroquine (10 mg/kg) in combination were well-tolerated with no adverse  
78 events and no significant pharmacokinetic drug-drug interactions observed. Repeated daily  
79 ivermectin administration for seven days did not inhibit ivermectin bioavailability. It was recently  
80 demonstrated that both ivermectin and chloroquine inhibit replication of the novel Severe Acute  
81 Respiratory Syndrome Coronavirus 2 (SARS-CoV-2) *in vitro*. Further ivermectin and chloroquine  
82 trials in humans are warranted to evaluate their role in *Plasmodium vivax* control and as  
83 adjunctive therapies against COVID-19 infections.

84

85

86

87

88

89

## 90 Introduction

91 Novel chemoprophylactic therapeutics and vector control interventions could support and  
92 accelerate malaria elimination efforts. Ivermectin mass drug administration (MDA) has been  
93 proposed as a malaria control tool since it makes the blood of treated persons lethal to  
94 *Anopheles* mosquitoes, the vectors of malaria (1-5), and repeated ivermectin MDAs in Burkina  
95 Faso were able to reduce malaria transmission to humans (6). Ivermectin is a safe and well-  
96 tolerated endectocidal drug used widely in veterinary and human medicine to combat both  
97 internal and external parasites.

98 Ivermectin has been shown to inhibit liver-stage development of *Plasmodium berghei* in  
99 both an *in vitro* Huh7 human hepatoma cell line model (7) and an *in vivo* C57BL/6 mouse model  
100 (8). The *in vitro* half maximal inhibitory concentration (IC<sub>50</sub>) for ivermectin *P. berghei* inhibition,  
101 IC<sub>50</sub> = 1.8 µg/ml (2.1 µM), was higher than blood levels that can be achieved in treated humans.  
102 However, mice that were orally dosed with ivermectin at 1-10 mg/kg at 24 and 12 hours before  
103 and 12 hours after sporozoite challenge demonstrated liver-stage inhibition equal to primaquine  
104 (10 mg/kg) under the same dosing schedule (8). Human equivalent dosing (HED) that was  
105 evaluated in mice would correlate to ivermectin doses in the range of 0.08 – 0.81 mg/kg (9).  
106 Thus, ivermectin is promising for human malaria chemoprophylaxis as ivermectin doses as high  
107 as 2 mg/kg have been safely administered to humans (10). If ivermectin can prevent  
108 *Plasmodium* liver-stage infection, then ivermectin chemoprophylaxis could be considered in high  
109 risk groups such as forest-goers in the Greater Mekong Subregion or naïve soldiers deployed to  
110 malaria endemic areas. Furthermore, if ivermectin MDA is deployed for community-wide malaria  
111 vector control, and ivermectin is chemoprophylactic, then there would be direct benefits to MDA  
112 participants in preventing malaria infections.

113 *Plasmodium cynomolgi* infections in Rhesus macaques (*Macaca mulatta*) are routinely  
114 used as a surrogate human liver-stage model for *Plasmodium vivax* drug development. This

115 model can evaluate both the causal prophylaxis, (*i.e.* protection from developing liver schizonts),  
116 and the hypnozoitocidal (*i.e.* radical cure of liver hypnozoites) efficacy of compounds (11).  
117 Ivermectin has been used in Rhesus macaque colonies to treat mites (12), lice (13), and  
118 intestinal helminths, such as *Ascaris*, *Trichuris*, and *Strongyloides fulleborni* (14-16). Pre-clinical  
119 studies demonstrated that oral ivermectin was safe in macaques at doses up to 1.2 mg/kg for 14  
120 days and that macaques are an ideal animal model for ivermectin human treatment (17, 18).  
121 However, no study to date has evaluated the pharmacokinetics of repeated ivermectin treatment  
122 in Rhesus macaques or in combination with chloroquine.

123 Here we evaluate the *in vitro* and *in vivo* liver-stage effect of ivermectin against *P.*  
124 *cynomolgi* in Rhesus macaque liver hepatocytes and infected macaques. The safety and  
125 pharmacokinetics of repeated oral ivermectin dosing with and without chloroquine in macaques  
126 is also presented.

127

## 128 **Results**

### 129 ***In vitro* results**

130 Ivermectin efficacy against liver-stage parasites was initially evaluated using an *in vitro P.*  
131 *cynomolgi* liver model which utilizes primary Rhesus macaque hepatocytes in order to closely  
132 resemble the *in vivo* anti-relapse mode. The drugging regimen was defined by treatment mode,  
133 either prophylactic mode (*i.e.* drug administered with sporozoites and 3 days thereafter) or  
134 radical cure mode (*i.e.* drug administered from days 4 to 7 post sporozoite infection) similar to  
135 previously described methods (19). In prophylactic mode, ivermectin showed marginal *in vitro*  
136 causal protection against the development of *P. cynomolgi*-infected rhesus macaque hepatocyte  
137 liver schizonts  $IC_{50} = 9.12 \mu\text{g/ml}$  ( $10.42 \mu\text{M}$ ) and hypnozoites  $IC_{50} = 25.59 \mu\text{g/ml}$  ( $29.24 \mu\text{M}$ )  
138 (Figure 1). However, in radical cure mode, ivermectin had no activity on developing *P.*

139 *cynomolgi* liver schizonts or established hypnozoites, even when dosed at a high initial  
140 concentration of 100 µg/ml (114.26 µM).

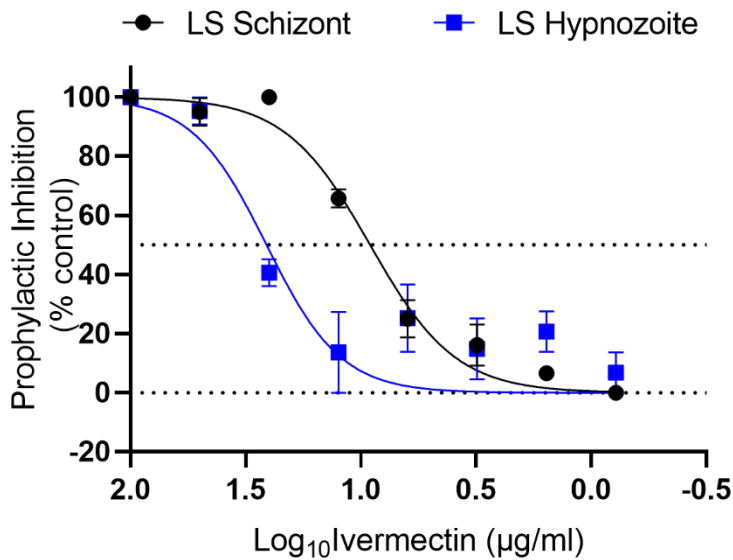

141

142 **Figure 1) *In vitro Plasmodium cynomolgi* liver-stage ivermectin inhibition prophylactic**

143 **results.** Prophylactic (days 1-3) exposure of *P. cynomolgi* to ivermectin demonstrated marginal  
144 inhibition of liver schizonts (IC<sub>50</sub> = 9.12 µg/ml) and hypnozoites (IC<sub>50</sub> = 25.59 µg/ml). LS = liver-  
145 stage. Graph bars represent means with standard deviation of biological replicates (n = 3) with  
146 experimental replicates (n = 2).

147

148 ***In vivo results: Ivermectin and chloroquine safety and tolerability***

149 There was only one adverse event in a single macaque (R1435) that vomited three hours after  
150 the first oral dose of ivermectin (1.2 mg/kg) when administered as monotherapy one day prior to  
151 *P. cynomolgi* sporozoite injection. No adverse events occurred when ivermectin (0.6 or 1.2  
152 mg/kg) was co-administered with chloroquine. No abnormal hematology outcomes were  
153 observed for ivermectin alone or ivermectin plus chloroquine co-administration.

154

155 ***In vivo results: Parasitemia***

156 Primary blood-stage parasitemia greater than 5,000/ $\mu$ l was detected ten days post inoculation  
157 for negative and positive control groups and for 2 of 3 macaques in both ivermectin high (1.2  
158 mg/kg)- and low (0.3 mg/kg)-dose groups, with remaining macaques from each group reaching  
159 greater than 5,000/ $\mu$ l eleven days post inoculation which was 5 and 6 days after the last  
160 ivermectin administration. Primary infection blood-stage parasitemia was cleared from the  
161 negative control group with ten days of chloroquine (10 mg/kg) and both blood- and liver-stage  
162 parasites from positive control group with seven days of chloroquine (10 mg/kg) and primaquine  
163 (1.78 mg/kg). Blood-stage parasitemia was cleared from the three macaques in the low-dose  
164 ivermectin group with seven days ivermectin (0.6 mg/kg) and ten days chloroquine (10 mg/kg).  
165 Two of three macaques were cleared of primary infection blood-stage parasitemia in the high-  
166 dose group with ivermectin (1.2 mg/kg) for seven days and chloroquine (10 mg/kg) for ten days,  
167 while one macaque was cleared with ivermectin (1.2 mg/kg) and chloroquine (10 mg/kg) for  
168 seven days. However, the first relapse occurred within 3 weeks, at approximately the same time  
169 for negative control and both ivermectin groups with no significant differences for time to blood-  
170 stage parasitemia or treatment (Log-Rank (Mantel Cox) test  $P > 0.05$ ). The first relapse infection  
171 blood-stage parasitemia was cleared from the negative control with chloroquine (10 mg/kg)  
172 alone for seven days. First relapse infection blood-stage parasitemia was cleared from both high  
173 (1.2 mg/kg)- and low (1.2 mg/kg)-dose ivermectin groups when given in combination with  
174 chloroquine (10 mg/kg) for seven days. Approximately 3 weeks later, a second relapse occurred  
175 in all negative control and ivermectin high- and low-dose treated macaques with no significant  
176 differences for time to blood-stage parasitemia or treatment (Log-Rank (Mantel Cox) test  $P >$   
177 0.05). At the point of second relapse, all ivermectin-group macaques were treated with  
178 primaquine (1.78 mg/kg) and chloroquine (10 mg/kg) for seven days. The positive control group



179 was treated with primaquine (1.78 mg/kg) and chloroquine (10 mg/kg) for seven days at point of  
180 primary infection and had no relapses for the remainder of the study (Figure 2). The negative  
181 control group was treated with primaquine (1.78 mg/kg) and chloroquine (10 mg/kg) for seven  
182 days at the point of third relapse (data not shown).

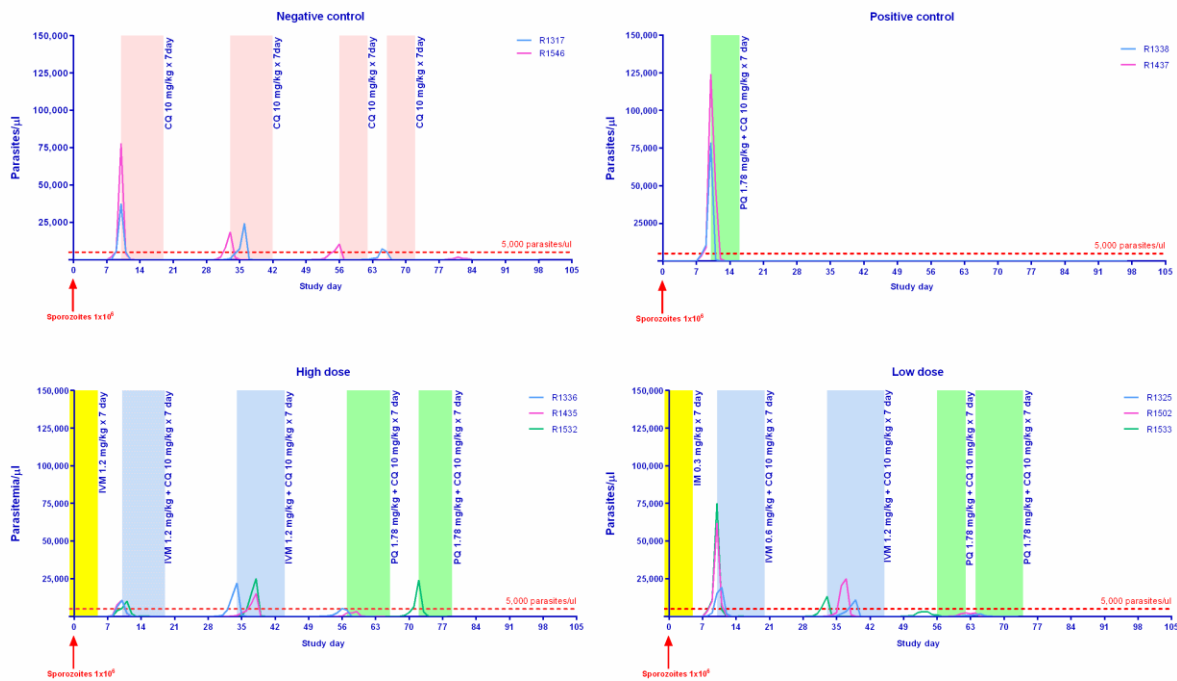

183

184 **Figure 2) Blood-stage *Plasmodium cynomolgi* parasitemia results and drug regimen for**  
185 **each treatment group**

186 Figure 2 displays the number of *P. cynomolgi* blood-stage parasites per µl of blood. Shaded  
187 areas represent the duration of drug administration when daily drug dosing was administered:  
188 yellow for ivermectin, peach for chloroquine, blue for ivermectin plus chloroquine, and green for  
189 primaquine plus chloroquine. Numbers in the legend denote the individual macaque  
190 identification number. The dashed red line denotes the 5,000 parasites per µl cutoff to trigger  
191 drug administration. IVM = ivermectin, CQ = chloroquine, PQ = primaquine.

192

193 The qRT-PCR method detected primary blood-stage parasitemia one day earlier than  
194 microscopy at point of first infection for the negative and positive control group macaques and in  
195 two out of three ivermectin low-dose (0.3 mg/kg) macaques. The remaining four ivermectin high-  
196 and low-dose macaques had blood-stage parasitemia detected by qRT-PCR on the same day  
197 as microscopy.

198

### 199 ***In vivo results: Pharmacokinetics***

200 Plasma ivermectin with and without co-administration of 10 mg/kg chloroquine reached  
201 maximum concentration ( $C_{max}$ ) at approximately 2-4 hours post-dose and the elimination half-life  
202 ranged from 11-28 hr with accumulation index of 0.6-3.7. Plasma concentration time profile for  
203 the first 24 hours and pharmacokinetic parameters of ivermectin are shown in figure 3 and  
204 Tables 1 and 2.

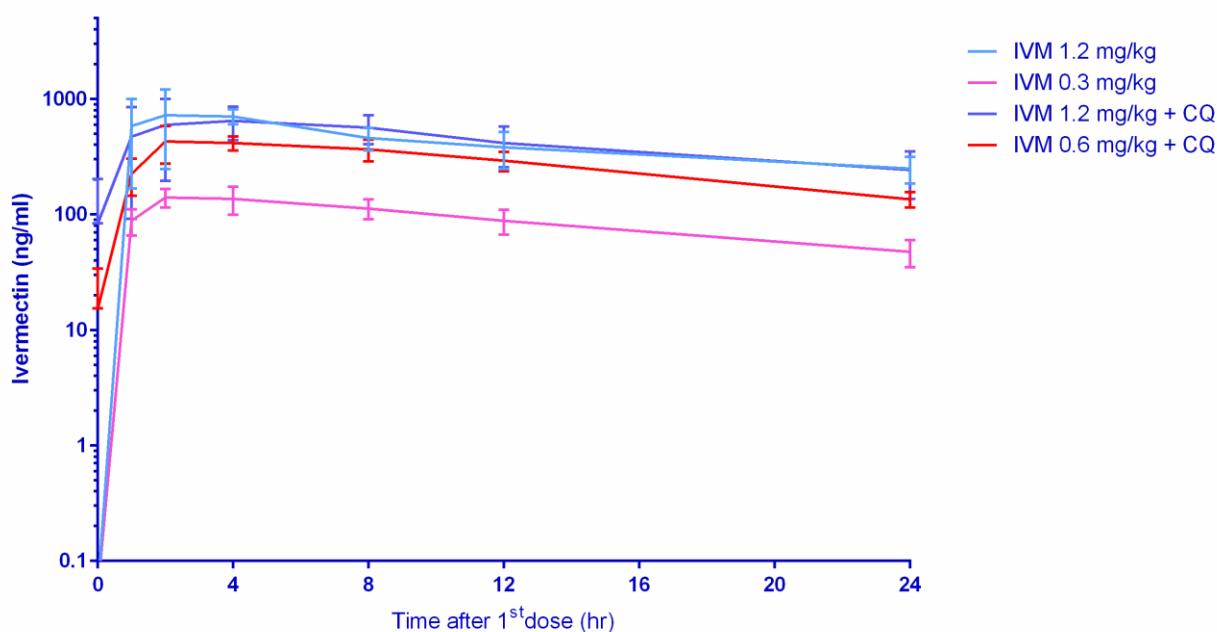

205

206

207 **Figure 3) Ivermectin concentrations achieved in macaques 24 hours post first oral dose**

208 Figure 3 represents the log concentration of ivermectin achieved in orally dosed macaques

209 within 24 hours post the first dose. IVM = ivermectin, CQ = chloroquine (10 mg/kg).

210

211 **Table 1) Pharmacokinetic parameters of ivermectin alone after 1<sup>st</sup> and 7<sup>th</sup> dose described**

212 **by non-compartmental analysis.**

| PK Parameter           | Units       | Ivermectin 0.3 mg/kg |      |                      |       | Ivermectin 1.2 mg/kg |       |                      |        |
|------------------------|-------------|----------------------|------|----------------------|-------|----------------------|-------|----------------------|--------|
|                        |             | 1 <sup>st</sup> dose |      | 7 <sup>th</sup> dose |       | 1 <sup>st</sup> dose |       | 7 <sup>th</sup> dose |        |
|                        |             | Average              | SD   | Average              | SD    | Average              | SD    | Average              | SD     |
| AUC <sub>%Extrap</sub> | %           | 29.2                 | 4.1  | 17.6                 | 11.5  | 37.4                 | 17.8  | 19.1                 | 19.1   |
| AUC <sub>24hr</sub>    | hr*ng/ml    | 2,152                | 460  | 6,481                | 853   | 10,188               | 2,781 | 28,495               | 7,190  |
| AUC <sub>INF</sub>     | hr*ng/ml    | n/a                  | n/a  | 8,017                | 1,950 | n/a                  | n/a   | 37,609               | 17,783 |
| Cl/F                   | L/hr/kg     | 0.10                 | 0.02 | 0.04                 | 0.01  | 0.08                 | 0.02  | 0.04                 | 0.01   |
| Vz/F                   | L/kg        | 1.90                 | 0.41 | 1.03                 | 0.25  | 1.73                 | 0.61  | 1.15                 | 0.16   |
| C <sub>max</sub>       | ng/ml       | 145.0                | 27.7 | 341.0                | 117.4 | 865.3                | 246.0 | 984.3                | 92.1   |
| C <sub>max</sub> /Dose | kg*ng/ml/mg | 483.3                | 92.4 | 1,136.7              | 391.3 | 721.1                | 205.0 | 820.3                | 76.8   |
| t <sub>1/2</sub>       | hr          | 13.1                 | 1.9  | 19.2                 | 6.9   | 16.5                 | 6.0   | 24.1                 | 8.3    |
| T <sub>max</sub>       | hr          | 3.3                  | 1.2  | 6.7                  | 4.6   | 2.7                  | 1.2   | 5.3                  | 2.3    |

213 Table 1 illustrates the pharmacokinetic parameters of ivermectin when administered alone after

214 the first and seventh (last) doses. AUC<sub>%Extrap</sub> is the percentage of area-under-the-curve infinity

215 due to extrapolation from the last collection time point to infinity, AUC<sub>24hr</sub> is the exposure

216 through 24 hours, AUC<sub>INF</sub> is the total exposure, Cl/F is the apparent clearance, Vz/F is the

217 apparent volume of distribution, C<sub>max</sub> is the maximum concentration, C<sub>max</sub>/Dose is the maximum

218 concentration divided by the dose administered, t<sub>1/2</sub> is the elimination half-life, and T<sub>max</sub> is the

219 time to reach the maximum concentration.

220

221 **Table 2) Pharmacokinetic parameters of ivermectin when co-administered with**

222 **chloroquine after 1<sup>st</sup> and 7<sup>th</sup> dose described by non-compartmental analysis.**

| PK Parameter           | Units       | Ivermectin 0.6 mg/kg + CQ 10 mg/kg |       |           |       | Ivermectin 1.2 mg/kg + CQ 10 mg/kg |       |           |        |
|------------------------|-------------|------------------------------------|-------|-----------|-------|------------------------------------|-------|-----------|--------|
|                        |             | First dose                         |       | Last dose |       | First dose                         |       | Last dose |        |
|                        |             | Average                            | SD    | Average   | SD    | Average                            | SD    | Average   | SD     |
| AUC <sub>%Extrap</sub> | %           | 24.8                               | 6.4   | 1.3       | 1.1   | 30.4                               | 13.5  | 4.5       | 5.7    |
| AUC <sub>24hr</sub>    | hr*ng/ml    | 6,742                              | 415   | 18,333    | 8,989 | 10,406                             | 2,793 | 38,079    | 41,331 |
| AUC <sub>INF</sub>     | hr*ng/ml    | n/a                                | n/a   | 18,618    | 9,314 | n/a                                | n/a   | 39,184    | 42,094 |
| Cl/F                   | L/hr/kg     | 0.07                               | 0.01  | 0.04      | 0.01  | 0.09                               | 0.03  | 0.06      | 0.05   |
| Vz/F                   | L/kg        | 1.10                               | 0.19  | 1.20      | 0.29  | 1.55                               | 0.47  | 1.60      | 0.75   |
| C <sub>max</sub>       | ng/ml       | 493.3                              | 62.1  | 419.7     | 21.5  | 742.0                              | 256.1 | 942.3     | 266.1  |
| C <sub>max</sub> /Dose | kg*ng/ml/mg | 822.2                              | 103.5 | 699.4     | 35.8  | 618.3                              | 213.4 | 785.3     | 221.7  |
| t <sub>1/2</sub>       | hr          | 11.5                               | 2.5   | 25.3      | 12.1  | 13.3                               | 4.5   | 28.3      | 23.6   |
| T <sub>max</sub>       | hr          | 4.0                                | 3.5   | 4.0       | 0.0   | 4.0                                | 3.5   | 4.0       | 0.0    |

223

224 Table 2 illustrates the pharmacokinetic parameters of ivermectin when administered with  
 225 chloroquine (10 mg/kg) after the first and seventh (last) doses. AUC<sub>%Extrap</sub> is the percentage of  
 226 area-under-the-curve infinity due to extrapolation from the last collection time point to infinity,  
 227 AUC<sub>24hr</sub> is the exposure through 24 hours, AUC<sub>INF</sub> is the total exposure, Cl/F is the apparent  
 228 clearance, Vz/F is the apparent volume of distribution, C<sub>max</sub> is the maximum concentration,  
 229 C<sub>max</sub>/Dose is the maximum concentration divided by the dose administered, t<sub>1/2</sub> is the elimination  
 230 half-life, and T<sub>max</sub> is the time to reach the maximum concentration. CQ = chloroquine.

231

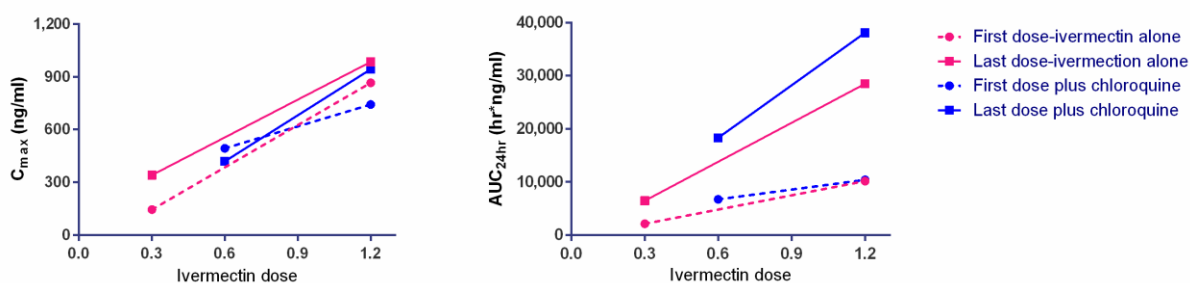

232

233 **Figure 4) Relative ivermectin parameter values for C<sub>max</sub> (left panel) and AUC<sub>24 hr</sub> (right**  
 234 **panel)**

235 Figure 4 illustrates the linear pharmacokinetics of ivermectin as  $C_{max}$  and AUC increased in a  
236 dose dependent manner. Higher dose of ivermectin resulted in increased drug exposure with  
237 repeated dosing. Chloroquine did not interfere with ivermectin pharmacokinetics.

238

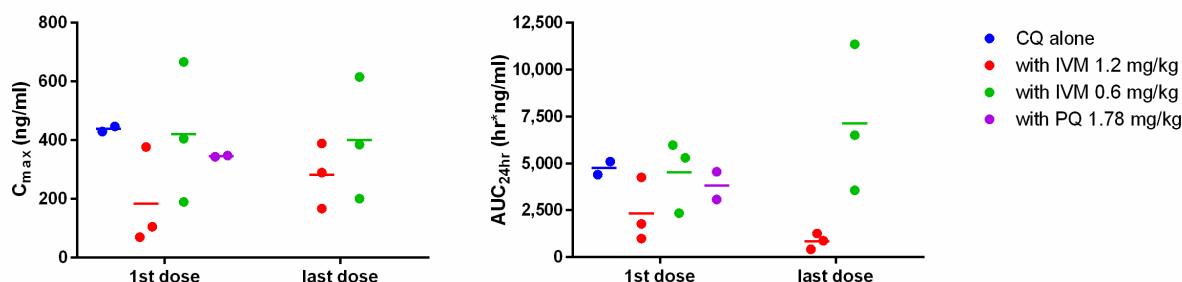

239

240 **Figure 5) Relative chloroquine parameter values for  $C_{max}$  (left panel) and AUC (24 hours)**  
241 **(right panel)**

242 Figure 5 illustrates that ivermectin did not have any effect on chloroquine  $C_{max}$  or  $AUC_{24hr}$

243 (Paired Sample T-test  $P > 0.05$ ). IVM = ivermectin, CQ = chloroquine, PQ = primaquine.

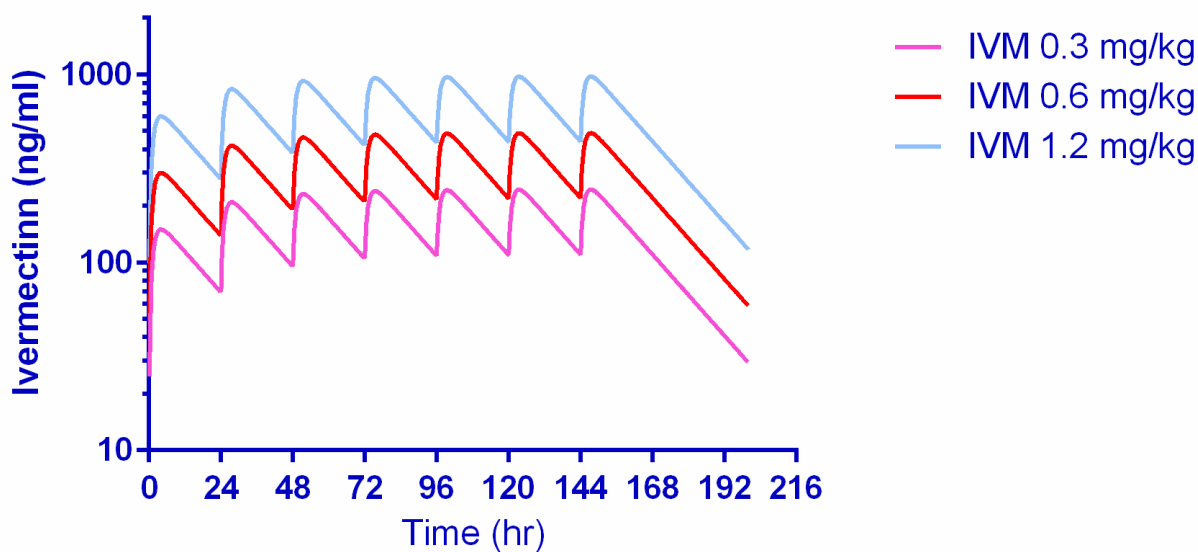

244

245 **Figure 6) Pharmacokinetic simulation of ivermectin concentration-time profile when**  
246 **given as 0.3, 0.6 and 1.2 mg/kg for 7 days in Rhesus macaques**

247 Figure 6 illustrates the simulation of plasma ivermectin concentration-time profile. One-  
248 compartment analysis best described the observed data by using the estimates calculated by  
249 non-compartmental analysis following the first and seventh doses as initial estimates. In the  
250 simulation,  $C_{max}$  had mean estimates of 150, 300, and 600 ng/ml at approximately 4 hr post first  
251 dose and reached a steady state around the fifth dose with  $C_{max}$  at 243, 486, and 973 ng/ml at  
252 the ivermectin 0.3, 0.6, and 1.2 mg/kg dosing, respectively. IVM = ivermectin.

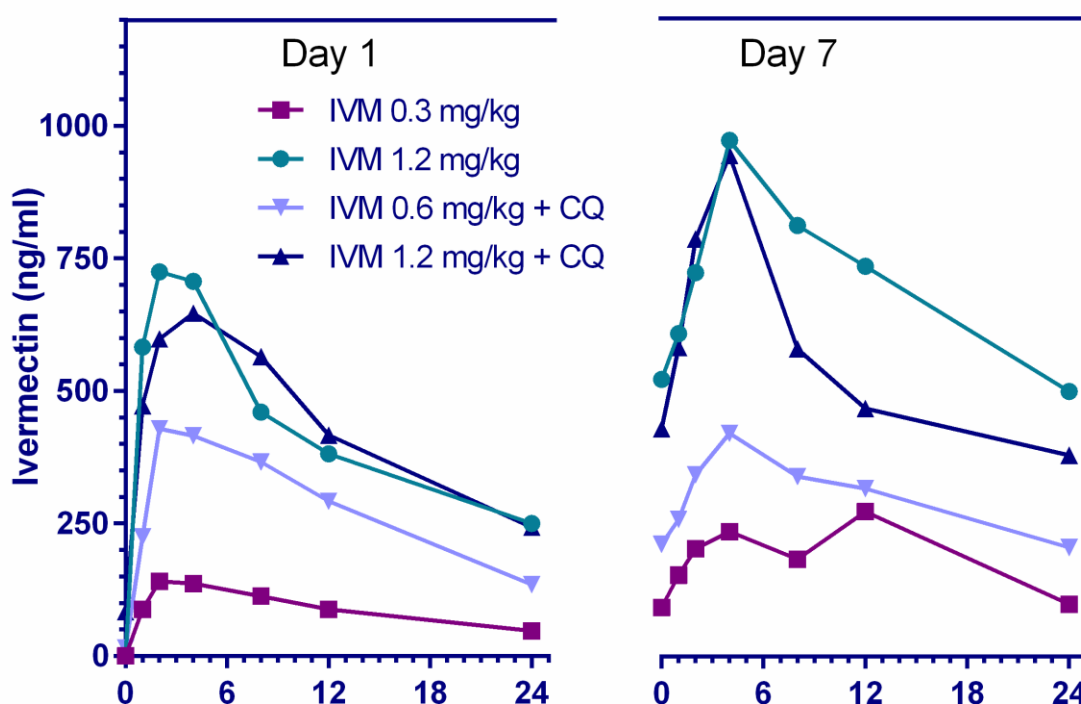

253  
254 **Figure 7) Mean plasma concentration-time profiles of ivermectin 24 hours after the first**  
255 **and seventh dose when administered ivermectin at 0.3, 0.6, and 1.2 mg/kg with and**  
256 **without chloroquine (10 mg/kg)**

257 Figure 7 illustrates the mean ivermectin plasma concentration (ng/ml) by time (hr) profile 24  
258 hours after the first and seventh dose with or without CQ (10 mg/kg). There was a slight  
259 reduction in peak concentrations achieved and delay in time to achieve peak concentrations  
260 when comparing the first and seventh doses. IVM = ivermectin, CQ = chloroquine.

261

## 262 Discussion

263 Ivermectin alone was safe and well-tolerated in macaques with repeated doses at 0.3 and 1.2  
264 mg/kg for seven days, with no signs of neurological, gastroenterological, or hematological  
265 complications. One monkey vomited the first dose of ivermectin (1.2 mg/kg) when administered  
266 as monotherapy but had no emesis upon further dosing. Emesis was observed previously in  
267 ivermectin-treated macaques receiving 2 mg/kg single dose, and the occurrence of emesis  
268 increased with higher doses (4, 6, 8, 12, and 24 mg/kg) (17, 18). The combination of ivermectin  
269 (0.6 and 1.2 mg/kg) and chloroquine (10 mg/kg) for seven days was safe and well-tolerated in  
270 macaques.. This suggests that this combination could be used in humans during *P. vivax* MDAs  
271 in regions where chloroquine is still an effective *P. vivax* blood-stage therapeutic.

272 Prophylactic mode *in vitro* results with ivermectin parent compound indicate effect of  
273 ivermectin against *P. cynomolgi* liver schizonts and hypnozoites (Figure 1), but at higher  
274 concentrations than could be safely achieved in humans (10). However, there is a growing body  
275 of evidence that the activity of ivermectin is not restricted to the parent compound alone and that  
276 ivermectin metabolites may be active as well. Indeed, when comparing the effect of ivermectin  
277 metabolized by a human to that of parent compound mixed in human blood, the mosquito-lethal  
278 effect against *Anopheles dirus* and *Anopheles minimus* was 20- to 35- fold more potent (5) and  
279 the sporontocidal effect against *P. vivax* development in *An. aquasalis* was 5-fold lower (20).  
280 Even though *P. berghei in vitro* liver-stage IC<sub>50</sub>s were in the µg/ml range, liver schizont inhibition

281 was achieved *in vivo* with ivermectin at doses plausible for use in humans (8). The points above  
282 warranted evaluation of ivermectin against *P. cynomolgi* in Rhesus macaques even though *in*  
283 *vitro* IC<sub>50</sub>s were in the µg/ml range and ivermectin only reaches ng/ml concentrations in orally-  
284 treated hosts.

285         There was no delay to patency of first blood-stage *P. cynomolgi* infection in either low- or  
286 high-dose ivermectin groups (Figure 2). Ivermectin displayed µM levels of liver schizont efficacy  
287 *in vitro*, however, a lack of delay to blood-stage patency suggests minimal impact of ivermectin  
288 on liver schizont development. Admittedly, the injection of one million *P. cynomolgi* sporozoites  
289 into the macaque sets a very high bar for any drug as it only requires one sporozoite to develop  
290 into a liver schizont to continue the blood-stage malaria infection. This is in contrast to a single  
291 mosquito that is predicted to deliver <100 sporozoites during blood feeding (21). The *in vitro*  
292 ivermectin experiments indicated prophylactic inhibition of *P. cynomolgi* hypnozoite  
293 development at µM concentrations, however, the macaque ivermectin challenge clearly  
294 demonstrated development of hypnozoites as indicated by the first and second blood-stage  
295 relapses occurring at approximately the same time as negative vehicle controls (Figure 2).  
296 Neither *in vitro* nor *in vivo* *P. cynomolgi* models indicate a radical cure efficacy potential for  
297 ivermectin. A recent human challenge trial (n = 8) with intravenous injection of cryopreserved  
298 *Plasmodium falciparum* sporozoites (n = 3,200) and a single oral dose ivermectin (400 µg/kg)  
299 failed to show liver-stage inhibition in terms of time to blood-stage patency (22).

300         To the best of our knowledge this is highest repeated dose ivermectin pharmacokinetic  
301 investigation in any mammal species. There were no significant changes in the CI/F or T<sub>1/2</sub>. It  
302 should be noted that this study had a small sample size, only three macaques per ivermectin-  
303 treated group, and thus ivermectin autoinhibition warrants further evaluation in future trials. In  
304 humans, three repeated doses of ivermectin (30 or 60 mg) every third day did not inhibit C<sub>max</sub>  
305 when comparing the first and third dose, suggesting a lack of autoinhibition (10). In FVB mice



306 administered oral ivermectin (0.2 mg/kg) twice a week for five weeks there was a 1.7-fold  
307 reduction in 24 hour post-dose plasma ivermectin concentrations, while increasing the major  
308 metabolite concentration by 1.7-fold (23), suggesting induction of metabolism.

309 In macaques, co-administration of ivermectin (0.6 or 1.2 mg/kg) and chloroquine (10  
310 mg/kg) for seven days was safe and well-tolerated. Co-administration of chloroquine and  
311 ivermectin did not have an effect on the  $C_{max}$  or AUC of ivermectin or chloroquine (Tables 1 and  
312 2; Figure 5). The 1.2 and 0.6 mg/kg dose in macaques has an approximate HEDs of 0.55 mg/kg  
313 (total 3.85 mg/kg) and 0.27 mg/kg (total 1.89 mg/kg) respectively. This suggests that repeated  
314 daily dosing of ivermectin at 0.6 or 0.3 mg/kg could be used in combination with chloroquine in  
315 humans. While billions of ivermectin and chloroquine treatments have been administered to  
316 humans, there is very limited safety evidence for their co-administration. Only one study, on  
317 *Plasmodium vivax*, has co-administered ivermectin (0.2 mg/kg single-dose) and chloroquine  
318 (0.6 mg/kg first day, 0.45 mg/kg second and third day), in ten persons with no adverse events  
319 passively reported (20).

320 Ivermectin (24), chloroquine (25), and hydroxychloroquine (26, 27) have been shown *in*  
321 *vitro* to inhibit replication of the novel Severe Acute Respiratory Syndrome Coronavirus 2  
322 (SARS-CoV-2). All three drugs distribute into lung tissues at higher concentrations than plasma  
323 for chloroquine and hydroxychloroquine in rats (28), for hydroxychloroquine in mice (29), and for  
324 ivermectin in goats (30) and cattle (31). Preliminary clinical evidence from an observational  
325 registry-based study found that COVID-19 patients that were ventilated and received single-  
326 dose ivermectin (150 µg/kg) had a significantly lower mortality rate, duration of hospitalization,  
327 and duration in the intensive care unit (32). The pre-clinical safety evidence in macaques  
328 presented here, *in vitro* efficacy, and preliminary clinical report on ivermectin efficacy in patients,  
329 warrants further investigation of ivermectin and chloroquine or hydroxychloroquine in SARS-  
330 CoV-2 infected persons.

331 This work verifies that the Rhesus macaque model provides a robust system for  
332 evaluating ivermectin pharmacokinetics. Newer formulations of ivermectin in development for  
333 humans, such as implants and expandable pill formulations (33, 34), could be evaluated in  
334 Rhesus macaques. Novel methods of *Plasmodium knowlesi* control, such as treatment of wild  
335 primates with ivermectin baits to target wild *Anopheles* populations could potentially be  
336 evaluated in this ivermectin macaque model system.

337 Although ivermectin was able to inhibit liver-stage development of *P. cynomolgi* *in vitro*,  
338 no demonstrable effect was observed with *in vivo* macaque challenge. Repeated doses of  
339 ivermectin (0.3, 0.6, 1.2 mg/kg) for seven days in macaques was safe with a corresponding rise  
340 in drug exposures (AUC), but no signs of autoinhibition. Co-administration of ivermectin (0.6 or  
341 1.2 mg/kg) and chloroquine was safe and well-tolerated, with no drug-drug interactions altering  
342 ivermectin or chloroquine pharmacokinetics. Further ivermectin and chloroquine trials in humans  
343 are warranted for *P. vivax* control and SARS-CoV-2 chemoprophylaxis and treatment.

344

## 345 **Materials & Methods**

### 346 ***In vitro* assay**

347 The complete methodology is pending publication (A. Roth, personal communication). In brief,  
348 cryopreserved primary non-human primate hepatocytes (lot NGB) and hepatocyte culture  
349 medium (HCM) (InVitroGro™ CP Medium) were obtained from BioIVT, Inc., (Baltimore, MD,  
350 USA) and thawed following manufacturer recommendations. The hepatocytes were plated into  
351 pre-collagen coated 384-well plates and used for experiments within 2 – 4 days after plating.  
352 Infectious sporozoites were obtained from *An. dirus* mosquitoes infected with *P. cynomolgi* B  
353 strain and used to infect the plated primary non-human primate hepatocytes. Ivermectin  
354 compound (Lot # MKBZ1802V, Sigma Aldrich, St. Louis, MO, USA) was dissolved in 100%

355 DMSO and used at a final concentration of 100 µg/ml in an 8-point, 2-fold serial dilution.  
356 Ivermectin was administered in two treatment modes, prophylactic and radical cure. In  
357 prophylactic mode, drug was present for 4 days starting at point of sporozoite addition.  
358 Alternatively, in radical cure mode, drug was present for 4 days starting on day 4 post  
359 sporozoite inoculation.

360           Imaging and data analysis of the drug plates were completed using the Operetta CLS  
361 Imaging System and Harmony software 4.1 (Perkin Elmer, Waltham, MA, USA). Images were  
362 acquired using TRITC, DAPI, and bright field channels at 10x magnification. Parasites were  
363 counted with the TRITC channel and were identified by area, mean intensity, maximum intensity  
364 and cell roundness. Ivermectin IC<sub>50</sub> curves and percent inhibition were generated using parasite  
365 population counts where controls were calculated as the average of replicates. The reported  
366 IC<sub>50</sub>s were obtained from two experimental replicates with three biological replicates for  
367 prophylactic mode and two biological replicates for radical cure mode, using an 8-point  
368 concentration format with 2-fold dilutions for final ivermectin concentrations of 0.781 to 100  
369 µg/ml. The percent inhibition was performed using dose-response modeling in GraphPad Prism  
370 version 8.0 (GraphPad, La Jolla, CA, USA) where measured parasite quantity (hypnozoite or  
371 schizont parasites) were normalized to the negative control (infected wells) using the average of  
372 experimental and biological replicates.

373

#### 374 ***In vivo macaque trial***

375 *Anopheles dirus* mosquitoes were used to produce *P. cynomolgi* (B strain) sporozoites, from a  
376 donor macaque infected with blood-stage *P. cynomolgi* parasites. For liver-stage challenge,  
377 each macaque was injected intravenously with 1 x 10<sup>6</sup> *P. cynomolgi* sporozoites in a 1ml  
378 inoculum of PBS and 0.5% bovine serum albumin. USAMD-AFRIMS colony-born Rhesus

379 macaques of Indian origin were used in this study. Ten healthy macaques, five male and five  
380 female, 3-5 years old and ranging in weight from 4.5-6.4 kg were selected for this study. All  
381 macaques were negative for simian retroviruses and simian herpes B virus. Two macaques  
382 served as negative controls and were treated initially with seven days of vehicle controls and  
383 treated with seven days of chloroquine (10 mg/kg) when parasitemia reached >5,000 parasites  
384 per  $\mu\text{l}$  at primary infection and first relapse, and with seven days chloroquine (10 mg/kg) plus  
385 primaquine (1.78 mg/kg) at second relapse. Two macaques served as positive causal  
386 prophylaxis controls and were treated initially with seven days of vehicle controls and treated  
387 with seven days of chloroquine (10 mg/kg) plus primaquine (1.78 mg/kg) at point of primary  
388 infection when parasites reached >5,000 parasites per  $\mu\text{l}$ . All study drugs were administered to  
389 restrained conscious macaques via nasogastric intubation at 1 ml/kg body weight.

390 Sparmection-E (Sparhawk Laboratories, Inc., Lenexa, KS, USA) is a water-soluble  
391 formulation of ivermectin developed for oral use in horses. Ivermectin was diluted in sterile  
392 water and administered via nasogastric route. Six macaques received ivermectin; three low-  
393 dose (0.3 mg/kg) and three high-dose (1.2 mg/kg) for seven consecutive days starting one day  
394 before sporozoite challenge. If a primary blood-stage infection occurs, and blood-stage  
395 parasitemia reaches >5,000 parasites per  $\mu\text{l}$ , then the macaques receive seven days of  
396 chloroquine (10 mg/kg) plus ivermectin (1.2 mg/kg) for the high-dose group, and seven days of  
397 chloroquine (10 mg/kg) plus ivermectin (0.6 mg/kg) for the low-dose group. If a relapse occurs,  
398 and blood-stage parasitemia reaches >5,000 parasites per  $\mu\text{l}$ , then macaques received seven  
399 days of chloroquine (10mg/kg) plus ivermectin (1.2 mg/kg) for both the low- and high-dose  
400 groups. If a second relapse occurs, then the macaques were treated with seven days of  
401 chloroquine (10 mg/kg) and primaquine (1.78 mg/kg), terminating the experiment. Both the  
402 negative and positive control group macaques were treated with seven days of chloroquine (10  
403 mg/kg) and primaquine (1.78 mg/kg) at the third relapse and first infection, respectively.

404 Macaques were observed several times in the first few hours post dosing, and at least  
405 three times a day for the remainder of the study for any clinical signs of neurological (e.g. ataxia,  
406 lethargy, imbalance) or gastroenterological (e.g. diarrhea, vomiting, weight loss) complications.  
407 Venous blood was collected at select time points and after macaques become blood smear  
408 positive for hematocrit, white and red blood cell count was determined.

409

## 410 ***Parasitemia monitoring***

### 411 **Microscopy**

412 Thick and thin blood smear samples were made and examined daily to quantify malaria  
413 parasitemia. Samples were fixed in methanol and stained with Giemsa stain. Blood smears  
414 were examined for the presence or absence of blood-stage parasites under oil-immersion  
415 objective. If no parasites were found in 50 microscopic oil-immersion thick fields or  
416 approximately 1,000 white blood cells (WBCs), the smear was considered negative. The  
417 parasitemia level was reported as number of parasites per 1 $\mu$ l or mm<sup>3</sup> of whole blood. Parasites  
418 were counted per number of WBCs or red blood cells (RBCs) (i.e., per 1,000 WBCs or 1,000-  
419 10,000 RBCs). Parasitemia levels were calculated by the appropriate total blood cell count  
420 (white or red) per mm<sup>3</sup>.

421

### 422 **Real Time PCR**

423 Blood samples (0.2 ml) were collected on days 5, 6, and 7 after sporozoite injection. The same  
424 sampling schedule occurred in control macaques with the addition of sampling days 8, 9, and 10  
425 (1ml) to obtain infected blood for controls used for method development. Blood was collected,  
426 stored in EDTA tubes, and kept frozen at -80°C. Parasite DNA was extracted from 200  $\mu$ l from  
427 EDTA whole blood using EZ1 DNA blood kit with automated EZ1 Advanced XL purification

428 system (Qiagen, Hilden, Germany). Real Time PCR for *P. cynomolgi* detection was performed  
429 by using Rotor Gene Q 5plex HRM platform (Qiagen, Hilden, Germany). Primer and probe were  
430 designed to target *P. cynomolgi* small subunit rRNA of blood-stage parasites (GenBank  
431 accession number L08242.1). Primer and probe sequences are as follows; *P. cynomolgi* Fwd:  
432 5'-ATTGCGGTCGCAAATAATGAAG-3', *P. cynomolgi* Rev: 5'-GGTATGATAAGCCAGGGA  
433 AGTG-3', and probe: 5' FAM-TACTCGCTCCTTCTGTTCCCTGGA-BHQ1-3'. Real Time PCR  
434 reaction was carried out in a total of 25 µl reaction using Rotor-Gene Multiplex PCR kit (Qiagen,  
435 Hilden, Germany) and a final concentration of primer and probe at 0.5 µM and 0.2 µM,  
436 respectively. PCR cycling condition consists of PCR initial activation step at 95°C for 5 mins  
437 followed by 45 cycles of denaturation at 95°C for 15 secs and annealing /extension at 60°C for  
438 15 secs. The fluorescence data was acquired during annealing/extension step. Blood from a  
439 macaque (R915) previously infected with *P. cynomolgi* was used as a positive control and a  
440 cutoff at cycle 36 was used to define *P. cynomolgi* positive samples in this study.

441

## 442 **Pharmacokinetics**

### 443 **Sample collection and preparation**

444 Blood sampling (1ml) for pharmacokinetic time points: just prior to first ivermectin dose, and  
445 after first dose 1, 2, 4, 8, 12 hours, then each consecutive day just before dosing, then after the  
446 7<sup>th</sup> dose at 1, 2, 4, 8, 12 hours, and days 1, 2, 5, 12, 19. If a primary infection occurred, then the  
447 same blood sampling schedule was repeated, but no blood for pharmacokinetics were collected  
448 at first or second relapses. Blood was collected in heparinized sodium Vacutainer tubes and  
449 centrifuged at 2,500 rpm for 20 min and then the supernatant (plasma) was transferred and kept  
450 at -80°C until analysis was performed. Plasma was separated into two tubes with 200-400 µl in  
451 each tube. Ivermectin was extracted using protein precipitation method by 2:1 of ACN (with

452 IS):plasma volume, vortex mixed for 1 min and then centrifuged at 10,000 rpm for 10 min. 200  $\mu$ l  
453 of supernatant fluid was filtered through a 0.22  $\mu$ m PTFE membrane prior to inject to UPLC  
454 system.

455

#### 456 **Liquid chromatography-mass spectrometry analysis**

457 The liquid chromatography-mass spectrometry (LC-MS) was performed on Waters Acquity  
458 UPLC™ equipped with Waters Xevo® G2-XS QToF (Waters Corp., Milford, MA, USA). A  
459 Waters Acquity UPLC BEH C18 column (50x2.1 mm, 1.7  $\mu$ m particle size) with precolumn of the  
460 same material was used to separate the compounds. The gradient mobile phase used for  
461 analysis of ivermectin was 5 mM ammonium formate and 0.1% formic acid in waters and  
462 methanol with the column temperature of 40°C, flow rate at 0.4 ml/min. The total run time was 7  
463 min and the injection volume was 5  $\mu$ l. For mass spectrometry was set in the positive  
464 electrospray ionization mode with multiple reaction monitoring. Instrument parameters included  
465 capillary voltage of 3.5 kv, source and desolvation temperature of 150 and 400°C, respectively.  
466 The nitrogen generator was set at 120 lb/in<sup>2</sup> to generate cone and desolvation gas flow of 50  
467 and 800 L/H, respectively. The mass transitions were observed at m/Z 892.77→569.50 and  
468 894.79→571.52 for ivermectin and ivermectin-D2, respectively. Masslynx™ software (Waters  
469 Corp., Milford, MA, USA) was used for quantification.

470

#### 471 **Pharmacokinetic analysis**

472 Noncompartmental analysis (NCA) was used to generate pharmacokinetic parameters using  
473 Phoenix WinNonlin 8.1 (Certara USA, Inc., NJ, USA). The PK parameters determined were the  
474 elimination half-life ( $T_{1/2}$ ), maximum concentration in plasma ( $C_{max}$ ), time to reach  $C_{max}$  after  
475 dosing ( $T_{max}$ ), area under the concentration-time curve in 24 hour ( $AUC_{24hr}$ ), area under the

476 concentration-time curve after the last dose to infinity ( $AUC_{INF}$ ) and percentage of  $AUC_{INF}$  due to  
477 extrapolation from  $T_{last}$  (last collection time point) to infinity ( $AUC_{\%Extrap}$ ) and since the fraction of  
478 dose absorbed cannot be estimated for extravascular models, apparent volume of distribution  
479 ( $V_z/F$ ) and apparent clearance ( $CL/F$ ) were substituted for  $V$  and  $CL$ . Data analysis and  
480 graphical representation were completed using GraphPad Prism version 8.0.

481

## 482 **Pharmacokinetic modeling and simulation**

483 Generated NCA pharmacokinetic parameters were used as parameters estimates for  
484 compartment modelling. Observed ivermectin concentration were best described by one  
485 compartment analysis with first order absorption and first order elimination.

486

## 487 ***Ethical Statement***

488 The USAMD-AFRIMS Institutional Animal Care and Use Committee and the Animal Use Review  
489 Division, U.S. Army Medical Research and Materiel Command, reviewed and approved this  
490 study (PN 16-03). Animals were maintained in accordance with established principles under the  
491 Guide for the Care and Use of Laboratory Animals eighth edition (35), the Animals for Scientific  
492 Purposes Act (36) and its subsequent regulations. The USAMD-AFRIMS animal care and use  
493 program has been accredited by the Association for Assessment and Accreditation for  
494 Laboratory Animal Care International (AAALACi).

495

## 496 **Acknowledgements**

497 We thank the AFRIMS Department of Veterinary Medicine for conducting the macaque trial  
498 especially Laksanee Inamnuay, Kesara Chumpolkulwong, Natthasorn Komchareon, Chardchai



499 Burom, Noppon Popruk, Sujitra Tayamun, Mana Saithasao, Alongkorn Hanrujirakomjorn,  
500 Nuttawat Wongpim, Khongsak Saengpha, Phakorn Wilaisri, Chakkapat Detpattanan, Rachata  
501 Jecksang, Siwakorn Sirisrisopa, Yongyuth Kongkaew, Sakda Wosawanonkul, Sonchai  
502 Jansuwan, Amnart Andaeng, Chaisit Pornkhunviwat, Manas Kaewsurind, Wuthichai  
503 Puenchompu, Sawaeng Sripakdee, Dejmongkol Onchompoo, Thanaphon Rattanathan, Paitoon  
504 Hintong, Siwadol Samano and the Department of Entomology Malariology and Insectary  
505 Sections, especially Ratawan Ubalee and Siriporn Phasomkusolsil, for supporting the  
506 sporozoite production. Monoclonal antibody 7.2 (anti-GAPDH) was obtained from The European  
507 Malaria Reagent Repository (<http://www.malariaresearch.eu>). Funding sources include the  
508 Military Infectious Disease Research Program and the Defense Malaria Assistance Program.  
509 Funding support was provided by the University of South Florida College of Public Health  
510 Graduate Fellowship to A. Roth. The funders had no role in study design, data collection and  
511 interpretation, or the decision to submit the work for publication.

512

### 513 **Disclaimer**

514 Material has been reviewed by the Walter Reed Army Institute of Research. There is no  
515 objection to its presentation and/or publication. The opinions or assertions contained herein are  
516 the private views of the author, and are not to be construed as official, or as reflecting true views  
517 of the Department of the Army or the Department of Defense. Research was conducted under  
518 an approved animal use protocol in an AAALACi accredited facility in compliance with the  
519 Animal Welfare Act and other federal statutes and regulations relating to animals and  
520 experiments involving animals and adheres to principles stated in the Guide for the Care and  
521 Use of Laboratory Animals, NRC Publication, 2011 edition.

522

## 523 References

- 524 1. Chaccour C, Lines J, Whitty C. 2010. Effect of ivermectin on *Anopheles gambiae*  
525 mosquitoes fed on humans: the potential of oral insecticides in malaria control. *Journal*  
526 *of Infectious Diseases* 202:113-116.
- 527 2. Alout H, Krajacich B, Meyers J, Grubaugh N, Brackney D, Kobylinski K, DiClaro JI, Bolay  
528 F, Fakoli L, Diabaté A, Dabiré R, Bougma R, Foy B. 2014. Evaluation of ivermectin mass  
529 drug administration for malaria transmission control across different West African  
530 environments. *Malaria Journal* 13:e417.
- 531 3. Smit M, Ochomo E, Aljayyousi G, Kwambai T, Abong'o B, Chen T, Bousema T, Slater  
532 H, Waterhouse D, Bayoh N, Gimnig J, Samuels A, Desai M, Phillips-Howard P, Kariuki  
533 S, Wang D, Ward S, Ter Kuile F. 2018. Safety and mosquitocidal efficacy of high-dose  
534 ivermectin when co-administered with dihydroartemisinin-piperaquine in Kenyan adults  
535 with uncomplicated malaria (IVERMAL): a randomised, double-blind, placebo-controlled  
536 trial. *Lancet Infectious Diseases* 18:615-626.
- 537 4. Ouédraogo A, Bastiaens G, Tiono A, Guelbéogo W, Kobylinski K, Ouédraogo A, Barry  
538 A, Bougouma E, Nebie I, Ouattara M, Lanke K, Fleckenstein L, Sauerwein R, Slater H,  
539 Churcher T, Sirima S, Drakeley C, Bousema T. 2015. Efficacy and safety of the  
540 mosquitocidal drug ivermectin to prevent malaria transmission after treatment: A double-  
541 blind, randomized, clinical trial. *Clinical Infectious Diseases* 60:357-365.
- 542 5. Kobylinski K, Jittamala P, Hanboonkunupakarn B, Pukrittayakamee S, Pantuwattana K,  
543 Phasomkulsolsil S, Davidson S, Winterberg M, Hoglund R, Mukaka M, Van der Pluijm R,  
544 Dondorp A, Day N, White N, Tarning J. 2020. Safety, pharmacokinetics, and mosquito-  
545 lethal effects of ivermectin in combination with dihydroartemisinin-piperaquine and  
546 primaquine in healthy adult Thai subjects *Clin Pharmacol Ther* 107:1221-1230.
- 547 6. Foy B, Alout H, Seaman J, Rao S, Magalhaes T, Wade M, Parikh S, Soma D, Sagna A,  
548 Fournet F, Slater H, Bougma R, Drabo F, Diabate A, Couliadiaty A, Rouamba N, Dabire  
549 R. 2019. Efficacy and risk of harms of repeat ivermectin mass drug administrations for  
550 control of malaria (RIMDAMAL): a cluster-randomised trial. *Lancet* 393:1517-1526.
- 551 7. da Cruz F, Martin C, Buchholz K, Lafuente-Monasterio M, Rodrigues T, Sonnichsen B,  
552 Moreira R, Gamo F, Marti M, Mota M, Hannus M, Prudencio M. 2012. Drug screen  
553 targeted at *Plasmodium* liver stages identifies a potent multistage antimalarial drug.  
554 *Journal of Infectious Diseases* 205:1278-86.
- 555 8. Mendes AM, Albuquerque IS, Machado M, Pissarra J, Meireles P, Prudencio M. 2017.  
556 Inhibition of *Plasmodium* Liver Infection by Ivermectin. *Antimicrobial Agents and*  
557 *Chemotherapy* 61:e02005-16.
- 558 9. Office of New Drugs in the Center for Drug Evaluation and Research (CDER). 2005.  
559 Guidance for Industry: Estimating the Maximum Safe Starting Dose in Initial Clinical  
560 Trials for Therapeutics in Adult Healthy Volunteers. Health and Human Services Food  
561 and Drug Administration, Silver Spring, MD.
- 562 10. Guzzo C, Furtek C, Porrás A, Chen C, Tipping R, Clineschmidt C, Sciberras D, Hsieh J-  
563 K, Lassetter K. 2002. Safety, tolerability, and pharmacokinetics of escalating high doses  
564 of ivermectin in healthy adult subjects. *Journal of Clinical Pharmacology* 42:1122-1133.
- 565 11. DiTusa C, Kozar M, Pybus B, Sousa J, Berman J, Gettayacamin M, Im-erbsin R,  
566 Tungtaeng A, Ohrt C. 2014. Causal prophylactic efficacy of primaquine, tafenoquine,  
567 and atovaquone-proguanil against *Plasmodium cynomolgi* in a rhesus monkey model. *J*  
568 *Parasitol* 100:671-3.
- 569 12. Joseph B, Wilson D, Henrickson R, Robinson P, Benirschke K. 1984. Treatment of  
570 pulmonary acariasis in rhesus macaques with ivermectin. *Lab Anim Sci* 34:360-4.

- 571 13. Mader D, Anderson J, Roberts J. 1989. Management of an infestation of sucking lice in a  
572 colony of rhesus macaques. *Lab Anim Sci* 39:252-5.
- 573 14. Wang T, Yang G, Yan H, Wang S, Bian Y, Chen A, Bi F. 2008. Comparison of efficacy of  
574 selamectin, ivermectin and mebendazole for the control of gastrointestinal nematodes in  
575 rhesus macaques, China. *Vet Parasitol* 153:121-5.
- 576 15. Dufour J, Cogswell F, Phillippi-Falkenstein K, Bohm R. 2006. Comparison of efficacy of  
577 moxidectin and ivermectin in the treatment of *Strongyloides fulleborni* infection in rhesus  
578 macaques. *J Med Primatol* 35:172-6.
- 579 16. Moudgil A, Singla L. 2018. Molecular confirmation and anthelmintic efficacy assessment  
580 against natural trichurid infections in zoo-housed non-human primates. *J Med Primatol*  
581 47:388-392.
- 582 17. Lankas G, Gordon L. 1989. Toxicology, p 89-112. *In* Campbell W (ed), Ivermectin and  
583 Abamectin. Springer.
- 584 18. Merck Research Laboratories. 1996. Stromectol® new drug application. FDA Center for  
585 drug evaluation and research.  
586 [http://www.accessdata.fda.gov/drugsatfda\\_docs/label/2009/050742s026lbl.pdf](http://www.accessdata.fda.gov/drugsatfda_docs/label/2009/050742s026lbl.pdf)
- 587 19. Roth A, Maher S, Conway A, Ubalee R, Chaumeau V, Andolina C, Kaba S, Vantaux A,  
588 Bakowski M, Luque R, Adapa S, Singh N, Barnes S, Cooper C, Rouillier M, McNamara  
589 C, Mikolajczak S, Sather N, Witkowski B, Campo B, Kappe S, Lanar D, Nosten F,  
590 Davidson S, Jiang R, Kyle D, Adams J. 2018. A comprehensive model for assessment of  
591 liver stage therapies targeting *Plasmodium vivax* and *Plasmodium falciparum*. *Nature*  
592 *Communications* 9:e1837.
- 593 20. Pinilla Y, S CPL, V SS, Andrade F, Melo G, Orfano A, Secundino N, Guerra M, Lacerda  
594 M, Kobylinski K, Escobedo-Vargas K, Lopez-Sifuentes V, Stoops C, Baldeviano G,  
595 Tarning J, Vasquez G, Pimenta P, Monteiro W. 2018. Promising approach to reducing  
596 Malaria transmission by ivermectin: Sporontocidal effect against *Plasmodium vivax* in  
597 the South American vectors *Anopheles aquasalis* and *Anopheles darlingi*. *PLoS*  
598 *Neglected Tropical Diseases* 12:e0006221.
- 599 21. Rosenberg R, Wirtz R, Schneider I, Burge R. 1990. An estimation of the number of  
600 malaria sporozoites ejected by a feeding mosquito. *Trans R Soc Trop Med Hyg* 84:209-  
601 12.
- 602 22. Metzger W, Theurer A, Pfeleiderer A, Molnar Z, Maihofer-Braatting D, Bissinger A, Sulyok  
603 Z, Kohler C, Egger-Adam D, Lalremruata A, Esen M, Lee Sim K, Hoffman S, Rabinovich  
604 R, Chaccour C, Alonso P, Mordmuller B, Kremsner P. 2020. Ivermectin for causal  
605 malaria prophylaxis: a randomised controlled human infection trial. *Trop Med Int Health*  
606 25:380-386.
- 607 23. Alberich M, Menez C, Sutra J, Lespine A. 2014. Ivermectin exposure leads to up-  
608 regulation of detoxification genes *in vitro* and *in vivo* in mice. *Eur J Pharmacol* 740:428-  
609 35.
- 610 24. Caly L, Druce J, Catton M, Jans D, Wagstaff K. 2020. The FDA-approved Drug  
611 Ivermectin inhibits the replication of SARS-CoV-2 *in vitro* *Antiviral Research* ePub.
- 612 25. Wang M, Cao R, Zhang L, Yang X, Liu J, Xu M, Shi Z, Hu Z, Zhong W, Xiao G. 2020.  
613 Remdesivir and chloroquine effectively inhibit the recently emerged novel coronavirus  
614 (2019-nCoV) *in vitro*. *Cell Res* 30:269-271.
- 615 26. Liu J, Cao R, Xu M, Wang X, Zhang H, Hu H, Li Y, Hu Z, Zhong W, Wang M. 2020.  
616 Hydroxychloroquine, a less toxic derivative of chloroquine, is effective in inhibiting  
617 SARS-CoV-2 infection *in vitro*. *Cell Discov* 6:e16.
- 618 27. Yao X, Ye F, Zhang M, Cui C, Huang B, Niu P, Liu X, Zhao L, Dong E, Song C, Zhan S,  
619 Lu R, Li H, Tan W, Liu D. 2020. *In Vitro* Antiviral Activity and Projection of Optimized  
620 Dosing Design of Hydroxychloroquine for the Treatment of Severe Acute Respiratory  
621 Syndrome Coronavirus 2 (SARS-CoV-2). *Clin Infect Dis* ePub.

- 622 28. McChesney E, Banks W, Fabian R. 1967. Tissue distribution of chloroquine,  
623 hydroxychloroquine, and desethylchloroquine in the rat. *Toxicol Appl Pharmacol* 10:501-  
624 13.
- 625 29. Chhonker Y, Sleightholm R, Li J, Oupicky D, Murry D. 2018. Simultaneous quantitation  
626 of hydroxychloroquine and its metabolites in mouse blood and tissues using LC-ESI-  
627 MS/MS: An application for pharmacokinetic studies. *J Chromatogr B Analyt Technol*  
628 *Biomed Life Sci* 1072:320-327.
- 629 30. Lespine A, Alvinerie M, Sutra J, Pors I, Chartier C. 2005. Influence of the route of  
630 administration on efficacy and tissue distribution of ivermectin in goat. *Vet Parasitol*  
631 128:251-60.
- 632 31. Lifschitz A, Virkel G, Sallovitz J, Sutra J, Galtier P, Alvinerie M, Lanusse C. 2000.  
633 Comparative distribution of ivermectin and doramectin to parasite location tissues in  
634 cattle. *Vet Parasitol* 87:327-38.
- 635 32. Patel A, Desai S, Grainger D, Mehra M. 2020. Ivermectin in COVID-19 Related Critical  
636 Illness. SSRN ePub.
- 637 33. Chaccour C, Barrio Á, Gil Royo A, Martinez Urbistondo D, Slater H, Hammann F, Del  
638 Pozo J. 2015. Screening for an ivermectin slow-release formulation suitable for malaria  
639 vector control. *Malaria Journal* 14:e102.
- 640 34. Bellinger A, Jafari M, Grant T, Zhang S, Slater H, Wegner E, Mo S, Lee Y, Mazdiyasni  
641 H, Kogan L, Barman R, Cleveland C, Booth L, Bensel T, Minahan D, Hurowitz H, Tai T,  
642 Daily J, Nikolic B, Wood L, Eckoff P, Langer R, Traverso G. 2016. Oral, ultra-long-lasting  
643 drug delivery: Application toward malaria elimination goals. *Science Translational*  
644 *Medicine* 8:e157.
- 645 35. Institute for Laboratory Animal Research. 2011. *Guide for the Care and Use of*  
646 *Laboratory Animals*. The National Academies Press, Washington, D.C.
- 647 36. National Research Council of Thailand. 2015. *Animals for Scientific Purposes Act*.  
648 Government Gazette, Bangkok.
